# Supplementary material
Source: PubMed Central journal article supplement (PMC1962890)
Supplement: bmj_39280.509803.BEv3_1.pdf [file bmj_39280.509803.BEv3_1.pdf]

## **Please help us by completing this survey**

*Integrated care in practice: a randomised controlled trial of acupuncture as an adjunct to exercise-based physiotherapy for knee osteoarthritis*

We are striving to improve the way treatments are reported in the BMJ. As such we are interested in your views about the way the intervention was described in this paper.

If you are a practicing clinician/health care worker considering using the intervention described in this paper, we would greatly appreciate you spending a few minutes to answer this short questionnaire. Please read the webextra(s) before completing the survey.

To access the survey please click the following link or paste it into your web browser

[http://www.surveymonkey.com/s.aspx?sm=GWEIPsJK\\_2finNcFa\\_2f\\_2f\\_2fYwZw\\_3d\\_3d](http://www.surveymonkey.com/s.aspx?sm=GWEIPsJK_2finNcFa_2f_2f_2fYwZw_3d_3d)
